# Supplementary material for: p38-Mitogen Activated Kinases Mediate a Developmental Regulatory Response to Amino Acid Depletion and Associated Oxidative Stress in Mouse Blastocyst Embryos
Source: PubMed Central journal article supplement (PMC6856562; doi:10.3389/fcell.2019.00276), 2019-11-08
Supplement: Data_Sheet_1.pdf [file Data_Sheet_1.pdf]

**Supplementary table S2:** Quantification of total and NANOG and/or GATA4 expressing cell numbers for all analysed embryos in KSOM +/- amino acids + DMSO or SB220025 + 1 or 10mM NAC

| KSOM + 1mM NAC |             |                       |             |            |                        |            |             |                        |                            |  |  |
|----------------|-------------|-----------------------|-------------|------------|------------------------|------------|-------------|------------------------|----------------------------|--|--|
| DMSO           |             |                       |             |            |                        |            |             |                        |                            |  |  |
| #              | Embryo      | TOTAL NUMBER OF CELLS |             |            |                        |            |             | Ratio of PrE/Total ICM | Ratio of Inner/Outer cells |  |  |
|                |             | Double Negative       | NANOG +ve   | GATA4 +ve  | NANOG/GATA4 double +ve | PrE        | Total       |                        |                            |  |  |
| 1              | 82          | 63                    | 8           | 11         | 0                      | 11         | 19          | 0.58                   | 0.30                       |  |  |
| 2              | 65          | 63                    | 2           | 0          | 0                      | 0          | 2           | 0.00                   | 0.03                       |  |  |
| 3              | 38          | 28                    | 9           | 0          | 1                      | 0          | 10          | 0.00                   | 0.36                       |  |  |
| 4              | 70          | 49                    | 11          | 10         | 0                      | 10         | 21          | 0.48                   | 0.43                       |  |  |
| 5              | 70          | 60                    | 6           | 4          | 0                      | 4          | 10          | 0.40                   | 0.17                       |  |  |
| 6              | 71          | 53                    | 10          | 8          | 0                      | 8          | 18          | 0.44                   | 0.34                       |  |  |
| 7              | 89          | 73                    | 10          | 6          | 0                      | 6          | 16          | 0.38                   | 0.22                       |  |  |
| 8              | 83          | 70                    | 5           | 6          | 2                      | 6          | 13          | 0.46                   | 0.19                       |  |  |
| 9              | 95          | 80                    | 7           | 8          | 0                      | 8          | 15          | 0.53                   | 0.19                       |  |  |
| 10             | 96          | 82                    | 9           | 5          | 0                      | 5          | 14          | 0.36                   | 0.17                       |  |  |
| 11             | 88          | 73                    | 9           | 6          | 0                      | 6          | 15          | 0.40                   | 0.21                       |  |  |
| 12             | 74          | 68                    | 3           | 3          | 0                      | 3          | 6           | 0.50                   | 0.09                       |  |  |
| 13             | 85          | 60                    | 12          | 13         | 0                      | 13         | 25          | 0.52                   | 0.42                       |  |  |
| 14             | 98          | 69                    | 16          | 13         | 0                      | 13         | 29          | 0.45                   | 0.42                       |  |  |
| 15             | 111         | 79                    | 21          | 11         | 0                      | 11         | 32          | 0.34                   | 0.41                       |  |  |
| 16             | 80          | 65                    | 12          | 3          | 0                      | 3          | 15          | 0.20                   | 0.23                       |  |  |
| 17             | 77          | 57                    | 14          | 5          | 1                      | 5          | 20          | 0.25                   | 0.35                       |  |  |
| 18             | 97          | 75                    | 13          | 8          | 1                      | 8          | 22          | 0.36                   | 0.29                       |  |  |
| 19             | 73          | 51                    | 17          | 2          | 3                      | 2          | 22          | 0.09                   | 0.43                       |  |  |
| 20             | 70          | 43                    | 14          | 10         | 3                      | 10         | 27          | 0.37                   | 0.63                       |  |  |
| 21             | 91          | 68                    | 13          | 10         | 0                      | 10         | 23          | 0.43                   | 0.34                       |  |  |
| 22             | 62          | 50                    | 7           | 2          | 3                      | 2          | 12          | 0.17                   | 0.24                       |  |  |
| 23             | 75          | 47                    | 18          | 9          | 1                      | 9          | 28          | 0.32                   | 0.60                       |  |  |
| 24             | 91          | 73                    | 10          | 7          | 1                      | 7          | 18          | 0.39                   | 0.25                       |  |  |
| 25             | 64          | 52                    | 6           | 6          | 0                      | 6          | 12          | 0.50                   | 0.23                       |  |  |
| 26             | 84          | 71                    | 8           | 4          | 1                      | 4          | 13          | 0.31                   | 0.18                       |  |  |
| 27             | 77          | 58                    | 11          | 8          | 0                      | 8          | 19          | 0.42                   | 0.33                       |  |  |
| 28             | 84          | 70                    | 9           | 5          | 0                      | 5          | 14          | 0.36                   | 0.20                       |  |  |
| 29             |             |                       |             |            |                        |            |             |                        |                            |  |  |
| 30             |             |                       |             |            |                        |            |             |                        |                            |  |  |
| 31             |             |                       |             |            |                        |            |             |                        |                            |  |  |
| 32             |             |                       |             |            |                        |            |             |                        |                            |  |  |
| 33             |             |                       |             |            |                        |            |             |                        |                            |  |  |
| 34             |             |                       |             |            |                        |            |             |                        |                            |  |  |
| 35             |             |                       |             |            |                        |            |             |                        |                            |  |  |
| 36             |             |                       |             |            |                        |            |             |                        |                            |  |  |
| 37             |             |                       |             |            |                        |            |             |                        |                            |  |  |
| 38             |             |                       |             |            |                        |            |             |                        |                            |  |  |
| 39             |             |                       |             |            |                        |            |             |                        |                            |  |  |
| 40             |             |                       |             |            |                        |            |             |                        |                            |  |  |
| <b>TOTAL</b>   | <b>2240</b> | <b>1750</b>           | <b>290</b>  | <b>183</b> | <b>17</b>              | <b>183</b> | <b>490</b>  | <b>10.01</b>           | <b>8.22</b>                |  |  |
| <b>AVERAGE</b> | <b>80.0</b> | <b>62.5</b>           | <b>10.4</b> | <b>6.5</b> | <b>0.6</b>             | <b>6.5</b> | <b>17.5</b> | <b>0.36</b>            | <b>0.29</b>                |  |  |
| <b>SEM</b>     | <b>2.7</b>  | <b>2.4</b>            | <b>0.8</b>  | <b>0.7</b> | <b>0.2</b>             | <b>0.7</b> | <b>1.3</b>  | <b>0.03</b>            | <b>0.03</b>                |  |  |

| KSOM + 1mM NAC |             |                       |            |            |                        |            |            |                        |                            |  |  |
|----------------|-------------|-----------------------|------------|------------|------------------------|------------|------------|------------------------|----------------------------|--|--|
| p38 Inhibited  |             |                       |            |            |                        |            |            |                        |                            |  |  |
| #              | Embryo      | TOTAL NUMBER OF CELLS |            |            |                        |            |            | Ratio of PrE/Total ICM | Ratio of Inner/Outer cells |  |  |
|                |             | Double Negative       | NANOG +ve  | GATA4 +ve  | NANOG/GATA4 double +ve | PrE        | Total      |                        |                            |  |  |
| 1              | 43          | 41                    | 2          | 0          | 0                      | 0          | 2          | 0.00                   | 0.05                       |  |  |
| 2              | 42          | 36                    | 4          | 2          | 0                      | 2          | 6          | 0.33                   | 0.17                       |  |  |
| 3              | 46          | 43                    | 3          | 0          | 0                      | 0          | 3          | 0.00                   | 0.07                       |  |  |
| 4              | 63          | 56                    | 5          | 2          | 0                      | 2          | 7          | 0.29                   | 0.13                       |  |  |
| 5              | 58          | 48                    | 10         | 0          | 0                      | 0          | 10         | 0.00                   | 0.21                       |  |  |
| 6              | 27          | 16                    | 11         | 0          | 0                      | 0          | 11         | 0.00                   | 0.69                       |  |  |
| 7              | 38          | 36                    | 2          | 0          | 0                      | 0          | 2          | 0.00                   | 0.06                       |  |  |
| 8              | 56          | 48                    | 8          | 0          | 0                      | 0          | 8          | 0.00                   | 0.17                       |  |  |
| 9              | 34          | 25                    | 6          | 3          | 0                      | 3          | 9          | 0.33                   | 0.36                       |  |  |
| 10             | 51          | 37                    | 9          | 5          | 0                      | 5          | 14         | 0.36                   | 0.38                       |  |  |
| 11             | 29          | 11                    | 18         | 0          | 0                      | 0          | 18         | 0.00                   | 1.64                       |  |  |
| 12             | 48          | 43                    | 3          | 2          | 0                      | 2          | 5          | 0.40                   | 0.12                       |  |  |
| 13             | 34          | 30                    | 4          | 0          | 0                      | 0          | 4          | 0.00                   | 0.13                       |  |  |
| 14             | 35          | 29                    | 6          | 0          | 0                      | 0          | 6          | 0.00                   | 0.21                       |  |  |
| 15             | 52          | 46                    | 2          | 3          | 1                      | 3          | 6          | 0.50                   | 0.13                       |  |  |
| 16             | 58          | 47                    | 9          | 2          | 0                      | 2          | 11         | 0.18                   | 0.23                       |  |  |
| 17             | 41          | 34                    | 5          | 2          | 0                      | 2          | 7          | 0.29                   | 0.21                       |  |  |
| 18             | 67          | 53                    | 8          | 6          | 0                      | 6          | 14         | 0.43                   | 0.26                       |  |  |
| 19             | 67          | 62                    | 5          | 0          | 0                      | 0          | 5          | 0.00                   | 0.08                       |  |  |
| 20             | 70          | 54                    | 14         | 2          | 0                      | 2          | 16         | 0.13                   | 0.30                       |  |  |
| 21             | 77          | 63                    | 9          | 5          | 0                      | 5          | 14         | 0.36                   | 0.22                       |  |  |
| 22             | 43          | 29                    | 11         | 1          | 2                      | 1          | 14         | 0.07                   | 0.48                       |  |  |
| 23             | 58          | 50                    | 6          | 0          | 2                      | 0          | 8          | 0.00                   | 0.16                       |  |  |
| 24             | 92          | 78                    | 9          | 4          | 1                      | 4          | 14         | 0.29                   | 0.18                       |  |  |
| 25             | 71          | 61                    | 5          | 5          | 0                      | 5          | 10         | 0.50                   | 0.16                       |  |  |
| 26             | 55          | 46                    | 7          | 2          | 0                      | 2          | 9          | 0.22                   | 0.20                       |  |  |
| 27             | 47          | 40                    | 6          | 0          | 1                      | 0          | 7          | 0.00                   | 0.18                       |  |  |
| 28             | 78          | 67                    | 11         | 0          | 0                      | 0          | 11         | 0.00                   | 0.16                       |  |  |
| 29             | 83          | 81                    | 2          | 0          | 0                      | 0          | 2          | 0.00                   | 0.02                       |  |  |
| 30             | 81          | 70                    | 7          | 4          | 0                      | 4          | 11         | 0.36                   | 0.16                       |  |  |
| 31             | 47          | 46                    | 1          | 0          | 0                      | 0          | 1          | 0.00                   | 0.02                       |  |  |
| 32             | 45          | 38                    | 7          | 0          | 0                      | 0          | 7          | 0.00                   | 0.18                       |  |  |
| 33             | 75          | 67                    | 4          | 4          | 0                      | 4          | 8          | 0.50                   | 0.12                       |  |  |
| 34             | 65          | 61                    | 2          | 2          | 0                      | 2          | 4          | 0.50                   | 0.07                       |  |  |
| 35             | 60          | 51                    | 9          | 0          | 0                      | 0          | 9          | 0.00                   | 0.18                       |  |  |
| 36             | 70          | 63                    | 4          | 3          | 0                      | 3          | 7          | 0.43                   | 0.11                       |  |  |
| 37             | 60          | 51                    | 9          | 0          | 0                      | 0          | 9          | 0.00                   | 0.18                       |  |  |
| 38             | 59          | 59                    | 0          | 0          | 0                      | 0          | 0          | 0.00                   | 0.00                       |  |  |
| 39             |             |                       |            |            |                        |            |            |                        |                            |  |  |
| 40             |             |                       |            |            |                        |            |            |                        |                            |  |  |
| <b>TOTAL</b>   | <b>2125</b> | <b>1816</b>           | <b>243</b> | <b>59</b>  | <b>7</b>               | <b>59</b>  | <b>309</b> | <b>6.46</b>            | <b>8.35</b>                |  |  |
| <b>AVERAGE</b> | <b>55.9</b> | <b>47.8</b>           | <b>6.4</b> | <b>1.6</b> | <b>0.2</b>             | <b>1.6</b> | <b>8.1</b> | <b>0.17</b>            | <b>0.22</b>                |  |  |
| <b>SEM</b>     | <b>2.6</b>  | <b>2.6</b>            | <b>0.6</b> | <b>0.3</b> | <b>0.1</b>             | <b>0.3</b> | <b>0.7</b> | <b>0.03</b>            | <b>0.04</b>                |  |  |

| KSOM + 10mM NAC |             |                       |            |            |                        |            |             |                        |                            |  |  |
|-----------------|-------------|-----------------------|------------|------------|------------------------|------------|-------------|------------------------|----------------------------|--|--|
| DMSO            |             |                       |            |            |                        |            |             |                        |                            |  |  |
| #               | Embryo      | TOTAL NUMBER OF CELLS |            |            |                        |            |             | Ratio of PrE/Total ICM | Ratio of Inner/Outer cells |  |  |
|                 |             | Double Negative       | NANOG +ve  | GATA4 +ve  | NANOG/GATA4 double +ve | PrE        | Total       |                        |                            |  |  |
| 1               | 57          | 39                    | 10         | 8          | 0                      | 8          | 18          | 0.44                   | 0.46                       |  |  |
| 2               | 75          | 53                    | 16         | 6          | 0                      | 6          | 22          | 0.27                   | 0.42                       |  |  |
| 3               | 74          | 58                    | 9          | 7          | 0                      | 7          | 16          | 0.44                   | 0.28                       |  |  |
| 4               | 77          | 59                    | 15         | 3          | 0                      | 3          | 18          | 0.17                   | 0.31                       |  |  |
| 5               | 43          | 38                    | 5          | 0          | 0                      | 0          | 5           | 0.00                   | 0.13                       |  |  |
| 6               | 57          | 48                    | 3          | 5          | 1                      | 5          | 9           | 0.56                   | 0.19                       |  |  |
| 7               | 51          | 40                    | 11         | 0          | 0                      | 0          | 11          | 0.00                   | 0.28                       |  |  |
| 8               | 55          | 41                    | 10         | 4          | 0                      | 4          | 14          | 0.29                   | 0.34                       |  |  |
| 9               | 103         | 83                    | 10         | 8          | 2                      | 8          | 20          | 0.40                   | 0.24                       |  |  |
| 10              | 81          | 60                    | 10         | 11         | 0                      | 11         | 21          | 0.52                   | 0.35                       |  |  |
| 11              | 82          | 61                    | 9          | 11         | 1                      | 11         | 21          | 0.52                   | 0.34                       |  |  |
| 12              | 95          | 78                    | 7          | 10         | 0                      | 10         | 17          | 0.59                   | 0.22                       |  |  |
| 13              | 83          | 72                    | 8          | 3          | 0                      | 3          | 11          | 0.27                   | 0.15                       |  |  |
| 14              | 93          | 75                    | 9          | 9          | 0                      | 9          | 18          | 0.50                   | 0.24                       |  |  |
| 15              | 83          | 66                    | 9          | 8          | 0                      | 8          | 17          | 0.47                   | 0.26                       |  |  |
| 16              | 102         | 86                    | 7          | 9          | 0                      | 9          | 16          | 0.56                   | 0.19                       |  |  |
| 17              | 72          | 48                    | 12         | 12         | 0                      | 12         | 24          | 0.50                   | 0.50                       |  |  |
| 18              |             |                       |            |            |                        |            |             |                        |                            |  |  |
| 19              |             |                       |            |            |                        |            |             |                        |                            |  |  |
| 20              |             |                       |            |            |                        |            |             |                        |                            |  |  |
| <b>TOTAL</b>    | <b>1283</b> | <b>1005</b>           | <b>160</b> | <b>114</b> | <b>4</b>               | <b>114</b> | <b>278</b>  | <b>6.50</b>            | <b>4.88</b>                |  |  |
| <b>AVERAGE</b>  | <b>75.5</b> | <b>59.1</b>           | <b>9.4</b> | <b>6.7</b> | <b>0.2</b>             | <b>6.7</b> | <b>16.4</b> | <b>0.38</b>            | <b>0.29</b>                |  |  |
| <b>SEM</b>      | <b>4.3</b>  | <b>3.8</b>            | <b>0.8</b> | <b>0.9</b> | <b>0.1</b>             | <b>0.9</b> | <b>1.2</b>  | <b>0.05</b>            | <b>0.03</b>                |  |  |

| KSOM + 10mM NAC |             |                       |            |            |                        |            |            |                        |                            |  |  |
|-----------------|-------------|-----------------------|------------|------------|------------------------|------------|------------|------------------------|----------------------------|--|--|
| p38 Inhibited   |             |                       |            |            |                        |            |            |                        |                            |  |  |
| #               | Embryo      | TOTAL NUMBER OF CELLS |            |            |                        |            |            | Ratio of PrE/Total ICM | Ratio of Inner/Outer cells |  |  |
|                 |             | Double Negative       | NANOG +ve  | GATA4 +ve  | NANOG/GATA4 double +ve | PrE        | Total      |                        |                            |  |  |
| 1               | 30          | 27                    | 3          | 0          | 0                      | 0          | 3          | 0.00                   | 0.11                       |  |  |
| 2               | 61          | 56                    | 2          | 3          | 0                      | 3          | 5          | 0.60                   | 0.09                       |  |  |
| 3               | 45          | 35                    | 6          | 4          | 0                      | 4          | 10         | 0.40                   | 0.29                       |  |  |
| 4               | 52          | 37                    | 9          | 2          | 4                      | 2          | 15         | 0.13                   | 0.41                       |  |  |
| 5               | 40          | 32                    | 4          | 4          | 0                      | 4          | 8          | 0.50                   | 0.25                       |  |  |
| 6               | 50          | 44                    | 6          | 0          | 0                      | 0          | 6          | 0.00                   | 0.14                       |  |  |
| 7               | 49          | 45                    | 4          | 0          | 0                      | 0          | 4          | 0.00                   | 0.09                       |  |  |
| 8               | 52          | 39                    | 6          | 6          | 1                      | 6          | 13         | 0.46                   | 0.33                       |  |  |
| 9               | 68          | 55                    | 9          | 4          | 0                      | 4          | 13         | 0.31                   | 0.24                       |  |  |
| 10              | 90          | 74                    | 8          | 8          | 0                      | 8          | 16         | 0.50                   | 0.22                       |  |  |
| 11              | 69          | 61                    | 8          | 0          | 0                      | 0          | 8          | 0.00                   | 0.13                       |  |  |
| 12              | 78          | 59                    | 13         | 6          | 0                      | 6          | 19         | 0.32                   | 0.32                       |  |  |
| 13              | 62          | 52                    | 10         | 0          | 0                      | 0          | 10         | 0.00                   | 0.19                       |  |  |
| 14              | 47          | 39                    | 6          | 2          | 0                      | 2          | 8          | 0.25                   | 0.21                       |  |  |
| 15              | 81          | 67                    | 8          | 6          | 0                      | 6          | 14         | 0.43                   | 0.21                       |  |  |
| 16              | 72          | 64                    | 7          | 1          | 0                      | 1          | 8          | 0.13                   | 0.13                       |  |  |
| 17              | 52          | 45                    | 5          | 2          | 0                      | 2          | 7          | 0.29                   | 0.16                       |  |  |
| 18              | 36          | 25                    | 8          | 3          | 0                      | 3          | 11         | 0.27                   | 0.44                       |  |  |
| 19              |             |                       |            |            |                        |            |            |                        |                            |  |  |
| 20              |             |                       |            |            |                        |            |            |                        |                            |  |  |
| <b>TOTAL</b>    | <b>1034</b> | <b>856</b>            | <b>122</b> | <b>51</b>  | <b>5</b>               | <b>51</b>  | <b>178</b> | <b>4.58</b>            | <b>3.93</b>                |  |  |
| <b>AVERAGE</b>  | <b>57.4</b> | <b>47.6</b>           | <b>6.8</b> | <b>2.8</b> | <b>0.3</b>             | <b>2.8</b> | <b>9.9</b> | <b>0.25</b>            | <b>0.22</b>                |  |  |
| <b>SEM</b>      | <b>3.8</b>  | <b>3.3</b>            | <b>0.6</b> | <b>0.6</b> | <b>0.2</b>             | <b>0.6</b> | <b>1.0</b> | <b>0.05</b>            | <b>0.02</b>                |  |  |

Supplementary table S2 (contd.)

| KSOM+AA + 1mM NAC |                       |                 |             |            |                        |            |             |                        |                            |  |  |
|-------------------|-----------------------|-----------------|-------------|------------|------------------------|------------|-------------|------------------------|----------------------------|--|--|
| DMSO              |                       |                 |             |            |                        |            |             | p38 Inhibited          |                            |  |  |
| #                 | TOTAL NUMBER OF CELLS |                 |             |            |                        |            |             | Ratio of PrE/Total ICM | Ratio of Inner/Outer cells |  |  |
|                   | Embryo                | Double Negative | NANOG +ve   | GATA4 +ve  | NANOG/GATA4 double +ve | PrE        | Total       |                        |                            |  |  |
| 1                 | 97                    | 75              | 12          | 9          | 1                      | 9          | 22          | 0.41                   | 0.29                       |  |  |
| 2                 | 87                    | 77              | 7           | 1          | 2                      | 1          | 10          | 0.10                   | 0.13                       |  |  |
| 3                 | 49                    | 33              | 10          | 3          | 3                      | 3          | 16          | 0.19                   | 0.48                       |  |  |
| 4                 | 45                    | 30              | 11          | 1          | 3                      | 1          | 15          | 0.07                   | 0.50                       |  |  |
| 5                 | 68                    | 56              | 9           | 2          | 1                      | 2          | 12          | 0.17                   | 0.21                       |  |  |
| 6                 | 78                    | 50              | 17          | 11         | 0                      | 11         | 28          | 0.39                   | 0.56                       |  |  |
| 7                 | 78                    | 62              | 10          | 5          | 1                      | 5          | 16          | 0.31                   | 0.26                       |  |  |
| 8                 | 56                    | 53              | 3           | 0          | 0                      | 0          | 3           | 0.00                   | 0.06                       |  |  |
| 9                 | 68                    | 45              | 16          | 5          | 2                      | 5          | 23          | 0.22                   | 0.51                       |  |  |
| 10                | 91                    | 73              | 6           | 12         | 0                      | 12         | 18          | 0.67                   | 0.25                       |  |  |
| 11                | 78                    | 57              | 13          | 8          | 0                      | 8          | 21          | 0.38                   | 0.37                       |  |  |
| 12                | 89                    | 68              | 5           | 12         | 4                      | 12         | 21          | 0.57                   | 0.31                       |  |  |
| 13                | 93                    | 77              | 9           | 7          | 0                      | 7          | 16          | 0.44                   | 0.21                       |  |  |
| 14                | 88                    | 63              | 6           | 18         | 1                      | 18         | 25          | 0.72                   | 0.40                       |  |  |
| 15                | 73                    | 47              | 13          | 9          | 4                      | 9          | 26          | 0.35                   | 0.55                       |  |  |
| 16                | 67                    | 46              | 19          | 2          | 0                      | 2          | 21          | 0.10                   | 0.46                       |  |  |
| 17                | 79                    | 67              | 9           | 3          | 0                      | 3          | 12          | 0.25                   | 0.18                       |  |  |
| 18                | 100                   | 76              | 13          | 11         | 0                      | 11         | 24          | 0.46                   | 0.32                       |  |  |
| 19                | 93                    | 75              | 9           | 8          | 1                      | 8          | 18          | 0.44                   | 0.24                       |  |  |
| 20                | 90                    | 66              | 17          | 7          | 0                      | 7          | 24          | 0.29                   | 0.36                       |  |  |
| 21                |                       |                 |             |            |                        |            |             |                        |                            |  |  |
| 22                |                       |                 |             |            |                        |            |             |                        |                            |  |  |
| 23                |                       |                 |             |            |                        |            |             |                        |                            |  |  |
| 24                |                       |                 |             |            |                        |            |             |                        |                            |  |  |
| 25                |                       |                 |             |            |                        |            |             |                        |                            |  |  |
| 26                |                       |                 |             |            |                        |            |             |                        |                            |  |  |
| 27                |                       |                 |             |            |                        |            |             |                        |                            |  |  |
| 28                |                       |                 |             |            |                        |            |             |                        |                            |  |  |
| 29                |                       |                 |             |            |                        |            |             |                        |                            |  |  |
| 30                |                       |                 |             |            |                        |            |             |                        |                            |  |  |
| 31                |                       |                 |             |            |                        |            |             |                        |                            |  |  |
| 32                |                       |                 |             |            |                        |            |             |                        |                            |  |  |
| 33                |                       |                 |             |            |                        |            |             |                        |                            |  |  |
| 34                |                       |                 |             |            |                        |            |             |                        |                            |  |  |
| 35                |                       |                 |             |            |                        |            |             |                        |                            |  |  |
| 36                |                       |                 |             |            |                        |            |             |                        |                            |  |  |
| 37                |                       |                 |             |            |                        |            |             |                        |                            |  |  |
| 38                |                       |                 |             |            |                        |            |             |                        |                            |  |  |
| 39                |                       |                 |             |            |                        |            |             |                        |                            |  |  |
| 40                |                       |                 |             |            |                        |            |             |                        |                            |  |  |
| <b>TOTAL</b>      | <b>1567</b>           | <b>1196</b>     | <b>214</b>  | <b>134</b> | <b>23</b>              | <b>134</b> | <b>371</b>  | <b>6.52</b>            | <b>6.64</b>                |  |  |
| <b>AVERAGE</b>    | <b>78.4</b>           | <b>59.8</b>     | <b>10.7</b> | <b>6.7</b> | <b>1.2</b>             | <b>6.7</b> | <b>18.6</b> | <b>0.33</b>            | <b>0.33</b>                |  |  |
| <b>SEM</b>        | <b>3.5</b>            | <b>3.2</b>      | <b>1.0</b>  | <b>1.1</b> | <b>0.3</b>             | <b>1.1</b> | <b>1.4</b>  | <b>0.04</b>            | <b>0.03</b>                |  |  |

  

| #              | TOTAL NUMBER OF CELLS |                 |            |            |                        |            |             | Ratio of PrE/Total ICM | Ratio of Inner/Outer cells |
|----------------|-----------------------|-----------------|------------|------------|------------------------|------------|-------------|------------------------|----------------------------|
|                | Embryo                | Double Negative | NANOG +ve  | GATA4 +ve  | NANOG/GATA4 double +ve | PrE        | Total       |                        |                            |
| 1              | 79                    | 68              | 5          | 6          | 0                      | 6          | 11          | 0.55                   | 0.16                       |
| 2              | 57                    | 43              | 12         | 2          | 0                      | 2          | 14          | 0.14                   | 0.33                       |
| 3              | 63                    | 42              | 15         | 5          | 1                      | 5          | 21          | 0.24                   | 0.50                       |
| 4              | 66                    | 57              | 9          | 0          | 0                      | 0          | 9           | 0.00                   | 0.16                       |
| 5              | 60                    | 45              | 12         | 3          | 0                      | 3          | 15          | 0.20                   | 0.33                       |
| 6              | 81                    | 73              | 2          | 6          | 0                      | 6          | 8           | 0.75                   | 0.11                       |
| 7              | 95                    | 79              | 9          | 6          | 1                      | 6          | 16          | 0.38                   | 0.20                       |
| 8              | 59                    | 46              | 13         | 0          | 0                      | 0          | 13          | 0.00                   | 0.28                       |
| 9              | 13                    | 8               | 5          | 0          | 0                      | 0          | 5           | 0.00                   | 0.63                       |
| 10             | 76                    | 68              | 3          | 5          | 0                      | 5          | 8           | 0.63                   | 0.12                       |
| 11             | 28                    | 11              | 17         | 0          | 0                      | 0          | 17          | 0.00                   | 1.55                       |
| 12             | 96                    | 84              | 8          | 4          | 0                      | 4          | 12          | 0.33                   | 0.14                       |
| 13             | 76                    | 61              | 9          | 4          | 2                      | 4          | 15          | 0.27                   | 0.25                       |
| 14             | 71                    | 55              | 16         | 0          | 0                      | 0          | 16          | 0.00                   | 0.29                       |
| 15             | 45                    | 37              | 8          | 0          | 0                      | 0          | 8           | 0.00                   | 0.22                       |
| 16             | 58                    | 44              | 14         | 0          | 0                      | 0          | 14          | 0.00                   | 0.32                       |
| 17             | 85                    | 72              | 13         | 0          | 0                      | 0          | 13          | 0.00                   | 0.18                       |
| 18             | 60                    | 47              | 11         | 2          | 0                      | 2          | 13          | 0.15                   | 0.28                       |
| 19             | 80                    | 71              | 6          | 3          | 0                      | 3          | 9           | 0.33                   | 0.13                       |
| 20             | 63                    | 55              | 7          | 1          | 0                      | 1          | 8           | 0.13                   | 0.15                       |
| 21             | 62                    | 49              | 5          | 8          | 0                      | 8          | 13          | 0.62                   | 0.27                       |
| 22             | 22                    | 19              | 3          | 0          | 0                      | 0          | 3           | 0.00                   | 0.16                       |
| 23             |                       |                 |            |            |                        |            |             |                        |                            |
| 24             |                       |                 |            |            |                        |            |             |                        |                            |
| 25             |                       |                 |            |            |                        |            |             |                        |                            |
| 26             |                       |                 |            |            |                        |            |             |                        |                            |
| 27             |                       |                 |            |            |                        |            |             |                        |                            |
| 28             |                       |                 |            |            |                        |            |             |                        |                            |
| 29             |                       |                 |            |            |                        |            |             |                        |                            |
| 30             |                       |                 |            |            |                        |            |             |                        |                            |
| 31             |                       |                 |            |            |                        |            |             |                        |                            |
| 32             |                       |                 |            |            |                        |            |             |                        |                            |
| 33             |                       |                 |            |            |                        |            |             |                        |                            |
| 34             |                       |                 |            |            |                        |            |             |                        |                            |
| 35             |                       |                 |            |            |                        |            |             |                        |                            |
| 36             |                       |                 |            |            |                        |            |             |                        |                            |
| 37             |                       |                 |            |            |                        |            |             |                        |                            |
| 38             |                       |                 |            |            |                        |            |             |                        |                            |
| 39             |                       |                 |            |            |                        |            |             |                        |                            |
| 40             |                       |                 |            |            |                        |            |             |                        |                            |
| <b>TOTAL</b>   | <b>1395</b>           | <b>1134</b>     | <b>202</b> | <b>55</b>  | <b>4</b>               | <b>55</b>  | <b>261</b>  | <b>4.70</b>            | <b>6.73</b>                |
| <b>AVERAGE</b> | <b>63.4</b>           | <b>51.5</b>     | <b>9.2</b> | <b>2.5</b> | <b>0.2</b>             | <b>2.5</b> | <b>11.9</b> | <b>0.21</b>            | <b>0.31</b>                |
| <b>SEM</b>     | <b>4.6</b>            | <b>4.4</b>      | <b>0.9</b> | <b>0.6</b> | <b>0.1</b>             | <b>0.6</b> | <b>0.9</b>  | <b>0.05</b>            | <b>0.06</b>                |

| KSOM+AA + 10mM NAC |                       |                 |             |            |                        |            |             |                        |                            |  |  |
|--------------------|-----------------------|-----------------|-------------|------------|------------------------|------------|-------------|------------------------|----------------------------|--|--|
| DMSO               |                       |                 |             |            |                        |            |             | p38 Inhibited          |                            |  |  |
| #                  | TOTAL NUMBER OF CELLS |                 |             |            |                        |            |             | Ratio of PrE/Total ICM | Ratio of Inner/Outer cells |  |  |
|                    | Embryo                | Double Negative | NANOG +ve   | GATA4 +ve  | NANOG/GATA4 double +ve | PrE        | Total       |                        |                            |  |  |
| 1                  | 84                    | 61              | 17          | 6          | 0                      | 6          | 23          | 0.26                   | 0.38                       |  |  |
| 2                  | 64                    | 54              | 9           | 1          | 0                      | 1          | 10          | 0.10                   | 0.19                       |  |  |
| 3                  | 66                    | 41              | 21          | 3          | 1                      | 3          | 25          | 0.12                   | 0.61                       |  |  |
| 4                  | 66                    | 40              | 21          | 1          | 4                      | 1          | 26          | 0.04                   | 0.65                       |  |  |
| 5                  | 95                    | 67              | 16          | 12         | 0                      | 12         | 28          | 0.43                   | 0.42                       |  |  |
| 6                  | 58                    | 38              | 16          | 3          | 1                      | 3          | 20          | 0.15                   | 0.53                       |  |  |
| 7                  | 82                    | 65              | 7           | 10         | 0                      | 10         | 17          | 0.59                   | 0.26                       |  |  |
| 8                  | 92                    | 76              | 6           | 10         | 0                      | 10         | 16          | 0.63                   | 0.21                       |  |  |
| 9                  | 45                    | 35              | 5           | 4          | 1                      | 4          | 10          | 0.40                   | 0.29                       |  |  |
| 10                 | 70                    | 55              | 7           | 7          | 1                      | 7          | 15          | 0.47                   | 0.27                       |  |  |
| 11                 | 68                    | 57              | 7           | 4          | 0                      | 4          | 11          | 0.36                   | 0.19                       |  |  |
| 12                 | 57                    | 45              | 7           | 3          | 2                      | 3          | 12          | 0.25                   | 0.27                       |  |  |
| 13                 | 91                    | 75              | 9           | 7          | 0                      | 7          | 16          | 0.44                   | 0.21                       |  |  |
| 14                 | 93                    | 78              | 8           | 6          | 1                      | 6          | 15          | 0.40                   | 0.19                       |  |  |
| 15                 | 84                    | 64              | 8           | 11         | 1                      | 11         | 20          | 0.55                   | 0.31                       |  |  |
| 16                 | 85                    | 65              | 10          | 8          | 2                      | 8          | 20          | 0.40                   | 0.31                       |  |  |
| 17                 | 69                    | 59              | 10          | 0          | 0                      | 0          | 10          | 0.00                   | 0.17                       |  |  |
| 18                 | 71                    | 56              | 7           | 6          | 2                      | 6          | 15          | 0.40                   | 0.27                       |  |  |
| 19                 | 94                    | 72              | 11          | 11         | 0                      | 11         | 22          | 0.50                   | 0.31                       |  |  |
| 20                 |                       |                 |             |            |                        |            |             |                        |                            |  |  |
| 21                 |                       |                 |             |            |                        |            |             |                        |                            |  |  |
| 22                 |                       |                 |             |            |                        |            |             |                        |                            |  |  |
| 23                 |                       |                 |             |            |                        |            |             |                        |                            |  |  |
| 24                 |                       |                 |             |            |                        |            |             |                        |                            |  |  |
| 25                 |                       |                 |             |            |                        |            |             |                        |                            |  |  |
| 26                 |                       |                 |             |            |                        |            |             |                        |                            |  |  |
| 27                 |                       |                 |             |            |                        |            |             |                        |                            |  |  |
| 28                 |                       |                 |             |            |                        |            |             |                        |                            |  |  |
| 29                 |                       |                 |             |            |                        |            |             |                        |                            |  |  |
| 30                 |                       |                 |             |            |                        |            |             |                        |                            |  |  |
| 31                 |                       |                 |             |            |                        |            |             |                        |                            |  |  |
| 32                 |                       |                 |             |            |                        |            |             |                        |                            |  |  |
| 33                 |                       |                 |             |            |                        |            |             |                        |                            |  |  |
| 34                 |                       |                 |             |            |                        |            |             |                        |                            |  |  |
| 35                 |                       |                 |             |            |                        |            |             |                        |                            |  |  |
| 36                 |                       |                 |             |            |                        |            |             |                        |                            |  |  |
| 37                 |                       |                 |             |            |                        |            |             |                        |                            |  |  |
| 38                 |                       |                 |             |            |                        |            |             |                        |                            |  |  |
| 39                 |                       |                 |             |            |                        |            |             |                        |                            |  |  |
| 40                 |                       |                 |             |            |                        |            |             |                        |                            |  |  |
| <b>TOTAL</b>       | <b>1434</b>           | <b>1103</b>     | <b>202</b>  | <b>113</b> | <b>16</b>              | <b>113</b> | <b>331</b>  | <b>6.48</b>            | <b>6.03</b>                |  |  |
| <b>AVERAGE</b>     | <b>75.5</b>           | <b>58.1</b>     | <b>10.6</b> | <b>5.9</b> | <b>0.8</b>             | <b>5.9</b> | <b>17.4</b> | <b>0.34</b>            | <b>0.32</b>                |  |  |
| <b>SEM</b>         | <b>3.4</b>            | <b>3.0</b>      | <b>1.2</b>  | <b>0.8</b> | <b>0.2</b>             | <b>0.8</b> | <b>1.3</b>  | <b>0.04</b>            | <b>0.03</b>                |  |  |

  

| #              | TOTAL NUMBER OF CELLS |                 |             |            |                        |            |             | Ratio of PrE/Total ICM | Ratio of Inner/Outer cells |
|----------------|-----------------------|-----------------|-------------|------------|------------------------|------------|-------------|------------------------|----------------------------|
|                | Embryo                | Double Negative | NANOG +ve   | GATA4 +ve  | NANOG/GATA4 double +ve | PrE        | Total       |                        |                            |
| 1              | 52                    | 30              | 22          | 0          | 0                      | 0          | 22          | 0.00                   | 0.73                       |
| 2              | 51                    | 32              | 15          | 4          | 0                      | 4          | 19          | 0.21                   | 0.59                       |
| 3              | 67                    | 48              | 18          | 1          | 0                      | 1          | 19          | 0.05                   | 0.40                       |
| 4              | 58                    | 52              | 6           | 0          | 0                      | 0          | 6           | 0.00                   | 0.12                       |
| 5              | 55                    | 41              | 11          | 1          | 2                      | 1          | 14          | 0.07                   | 0.34                       |
| 6              | 77                    | 66              | 4           | 7          | 0                      | 7          | 11          | 0.64                   | 0.17                       |
| 7              | 84                    | 71              | 7           | 2          | 4                      | 2          | 13          | 0.15                   | 0.18                       |
| 8              | 61                    | 45              | 13          | 3          | 0                      | 3          | 16          | 0.19                   | 0.36                       |
| 9              | 65                    | 48              | 12          | 5          | 0                      | 5          | 17          | 0.29                   | 0.35                       |
| 10             | 25                    | 19              | 6           | 0          | 0                      | 0          | 6           | 0.00                   | 0.32                       |
| 11             | 53                    | 44              | 5           | 3          | 1                      | 3          | 9           | 0.33                   | 0.20                       |
| 12             | 63                    | 46              | 12          | 3          | 2                      | 3          | 17          | 0.18                   | 0.37                       |
| 13             | 97                    | 80              | 9           | 8          | 0                      | 8          | 17          | 0.47                   | 0.21                       |
| 14             | 60                    | 49              | 11          | 0          | 0                      | 0          | 11          | 0.00                   | 0.22                       |
| 15             | 81                    | 66              | 11          | 4          | 0                      | 4          | 15          | 0.27                   | 0.23                       |
| 16             | 74                    | 57              | 13          | 4          | 0                      | 4          | 17          | 0.24                   | 0.30                       |
| 17             | 67                    | 58              | 9           | 0          | 0                      | 0          | 9           | 0.00                   | 0.16                       |
| 18             | 81                    | 58              | 11          | 12         | 0                      | 12         | 23          | 0.52                   | 0.40                       |
| 19             | 74                    | 65              | 7           | 1          | 1                      | 1          | 9           | 0.11                   | 0.14                       |
| 20             | 106                   | 90              | 9           | 7          | 0                      | 7          | 16          | 0.44                   | 0.18                       |
| <b>TOTAL</b>   | <b>1351</b>           | <b>1065</b>     | <b>211</b>  | <b>65</b>  | <b>10</b>              | <b>65</b>  | <b>286</b>  | <b>4.16</b>            | <b>5.96</b>                |
| <b>AVERAGE</b> | <b>67.6</b>           | <b>53.3</b>     | <b>10.6</b> | <b>3.3</b> | <b>0.5</b>             | <b>3.3</b> | <b>14.3</b> | <b>0.21</b>            | <b>0.30</b>                |
| <b>SEM</b>     | <b>4.0</b>            | <b>3.8</b>      | <b>1.0</b>  | <b>0.7</b> | <b>0.2</b>             | <b>0.7</b> | <b>1.1</b>  | <b>0.04</b>            | <b>0.03</b>                |

**Supplementary table S3:** Quantification of total and NANOG and/or GATA6 expressing cell numbers for all analysed embryos in KSOM +/- amino acids + DMSO or SB220025 + 1 or 10mM NAC

| KSOM           |                       |                 |             |                        |            |             |                                           |                |                       |                 |            |                        |            |            |                                           |
|----------------|-----------------------|-----------------|-------------|------------------------|------------|-------------|-------------------------------------------|----------------|-----------------------|-----------------|------------|------------------------|------------|------------|-------------------------------------------|
| DMSO           |                       |                 |             |                        |            |             |                                           |                | p38 Inhibited         |                 |            |                        |            |            |                                           |
| #              | TOTAL NUMBER OF CELLS |                 |             |                        |            |             | Ratio of NANOG-GATA6 double +ve/Total ICM | #              | TOTAL NUMBER OF CELLS |                 |            |                        |            |            | Ratio of NANOG-GATA6 double +ve/Total ICM |
|                | Embryo                | Double Negative | NANOG +ve   | NANOG-GATA6 double +ve | PrE        | Total       |                                           |                | Embryo                | Double Negative | NANOG +ve  | NANOG-GATA6 double +ve | PrE        | Total      |                                           |
| 1              | 75                    | 63              | 4           | 6                      | 5          | 12          | 0.50                                      | 1              | 70                    | 65              | 3          | 5                      | 0          | 5          | 1.00                                      |
| 2              | 65                    | 51              | 12          | 9                      | 2          | 14          | 0.64                                      | 2              | 37                    | 35              | 2          | 2                      | 0          | 2          | 1.00                                      |
| 3              | 70                    | 60              | 5           | 4                      | 3          | 10          | 0.40                                      | 3              | 75                    | 67              | 6          | 5                      | 2          | 8          | 0.63                                      |
| 4              | 65                    | 52              | 6           | 11                     | 2          | 13          | 0.85                                      | 4              | 38                    | 21              | 17         | 17                     | 0          | 17         | 1.00                                      |
| 5              | 70                    | 52              | 8           | 4                      | 10         | 18          | 0.22                                      | 5              | 38                    | 29              | 9          | 9                      | 0          | 9          | 1.00                                      |
| 6              | 97                    | 78              | 11          | 8                      | 5          | 19          | 0.42                                      | 6              | 90                    | 84              | 5          | 2                      | 1          | 6          | 0.33                                      |
| 7              | 89                    | 73              | 9           | 4                      | 7          | 16          | 0.25                                      | 7              | 45                    | 37              | 8          | 8                      | 0          | 8          | 1.00                                      |
| 8              | 82                    | 67              | 11          | 6                      | 2          | 15          | 0.40                                      | 8              | 27                    | 16              | 11         | 11                     | 0          | 11         | 1.00                                      |
| 9              | 92                    | 80              | 10          | 3                      | 1          | 12          | 0.25                                      | 9              | 40                    | 35              | 5          | 5                      | 0          | 5          | 1.00                                      |
| 10             | 82                    | 55              | 15          | 8                      | 10         | 27          | 0.30                                      | 10             | 37                    | 30              | 5          | 7                      | 0          | 7          | 1.00                                      |
| 11             | 87                    | 60              | 24          | 23                     | 3          | 27          | 0.85                                      | 11             | 52                    | 43              | 9          | 9                      | 0          | 9          | 1.00                                      |
| 12             | 88                    | 65              | 9           | 7                      | 11         | 23          | 0.30                                      | 12             | 45                    | 34              | 11         | 11                     | 0          | 11         | 1.00                                      |
| 13             |                       |                 |             |                        |            |             |                                           | 13             |                       |                 |            |                        |            |            |                                           |
| 14             |                       |                 |             |                        |            |             |                                           | 14             |                       |                 |            |                        |            |            |                                           |
| 15             |                       |                 |             |                        |            |             |                                           | 15             |                       |                 |            |                        |            |            |                                           |
| <b>TOTAL</b>   | <b>962</b>            | <b>756</b>      | <b>124</b>  | <b>93</b>              | <b>61</b>  | <b>206</b>  | <b>5.38</b>                               | <b>TOTAL</b>   | <b>594</b>            | <b>496</b>      | <b>91</b>  | <b>91</b>              | <b>3</b>   | <b>98</b>  | <b>10.96</b>                              |
| <b>AVERAGE</b> | <b>80.2</b>           | <b>63.0</b>     | <b>10.3</b> | <b>7.8</b>             | <b>5.1</b> | <b>17.2</b> | <b>0.45</b>                               | <b>AVERAGE</b> | <b>49.5</b>           | <b>41.3</b>     | <b>7.6</b> | <b>7.6</b>             | <b>0.3</b> | <b>8.2</b> | <b>0.91</b>                               |
| <b>SEM</b>     | <b>3.1</b>            | <b>2.9</b>      | <b>1.5</b>  | <b>1.5</b>             | <b>1.0</b> | <b>1.7</b>  | <b>0.06</b>                               | <b>SEM</b>     | <b>5.5</b>            | <b>5.9</b>      | <b>1.2</b> | <b>1.2</b>             | <b>0.2</b> | <b>1.1</b> | <b>0.06</b>                               |

| KSOM with amino acids |                       |                 |           |                        |     |       |                                           |    |                       |                 |           |                        |     |       |                                           |
|-----------------------|-----------------------|-----------------|-----------|------------------------|-----|-------|-------------------------------------------|----|-----------------------|-----------------|-----------|------------------------|-----|-------|-------------------------------------------|
| DMSO                  |                       |                 |           |                        |     |       |                                           |    | p38 Inhibited         |                 |           |                        |     |       |                                           |
| #                     | TOTAL NUMBER OF CELLS |                 |           |                        |     |       | Ratio of NANOG-GATA6 double +ve/Total ICM | #  | TOTAL NUMBER OF CELLS |                 |           |                        |     |       | Ratio of NANOG-GATA6 double +ve/Total ICM |
|                       | Embryo                | Double Negative | NANOG +ve | NANOG-GATA6 double +ve | PrE | Total |                                           |    | Embryo                | Double Negative | NANOG +ve | NANOG-GATA6 double +ve | PrE | Total |                                           |
| 1                     | 84                    | 60              | 9         | 0                      | 15  | 24    | 0.00                                      | 1  | 75                    | 65              | 7         | 1                      | 3   | 10    | 0.10                                      |
| 2                     | 86                    | 62              | 14        | 11                     | 9   | 24    | 0.46                                      | 2  | 62                    | 43              | 16        | 4                      | 3   | 19    | 0.21                                      |
| 3                     | 89                    | 70              | 13        | 4                      | 6   | 19    | 0.21                                      | 3  | 61                    | 47              | 12        | 7                      | 2   | 14    | 0.50                                      |
| 4                     | 72                    | 58              | 11        | 8                      | 1   | 14    | 0.57                                      | 4  | 79                    | 66              | 9         | 2                      | 4   | 13    | 0.15                                      |
| 5                     | 58                    | 48              | 6         | 2                      | 4   | 10    | 0.20                                      | 5  | 23                    | 18              | 5         | 5                      | 0   | 5     | 1.00                                      |
| 6                     | 73                    | 52              | 6         | 2                      | 15  | 21    | 0.10                                      | 6  | 68                    | 54              | 9         | 2                      | 4   | 14    | 0.14                                      |
| 7                     | 85                    | 63              | 15        | 7                      | 5   | 22    | 0.32                                      | 7  | 68                    | 59              | 5         | 1                      | 4   | 9     | 0.11                                      |
| 8                     | 90                    | 67              | 7         | 2                      | 15  | 23    | 0.09                                      | 8  | 57                    | 43              | 9         | 2                      | 5   | 14    | 0.14                                      |
| 9                     | 85                    | 67              | 9         | 6                      | 7   | 18    | 0.33                                      | 9  | 63                    | 50              | 13        | 4                      | 0   | 13    | 0.31                                      |
| 10                    | 117                   | 98              | 11        | 4                      | 7   | 19    | 0.21                                      | 10 | 64                    | 59              | 5         | 5                      | 0   | 5     | 1.00                                      |
| 11                    | 84                    | 74              | 6         | 2                      | 4   | 10    | 0.20                                      | 11 | 66                    | 55              | 10        | 9                      | 1   | 11    | 0.82                                      |
| 12                    | 88                    | 69              | 10        | 3                      | 8   | 19    | 0.16                                      | 12 | 52                    | 44              | 4         | 2                      | 3   | 8     | 0.25                                      |
| 13                    | 107                   | 89              | 11        | 2                      | 7   | 18    | 0.11                                      | 13 | 68                    | 61              | 7         | 6                      | 0   | 7     | 0.86                                      |
| 14                    | 98                    | 68              | 12        | 3                      | 16  | 30    | 0.10                                      | 14 | 66                    | 50              | 15        | 11                     | 1   | 16    | 0.69                                      |
| 15                    | 94                    | 81              | 11        | 9                      | 1   | 13    | 0.69                                      | 15 | 60                    | 49              | 7         | 8                      | 2   | 11    | 0.73                                      |
| 16                    | 90                    | 67              | 16        | 6                      | 7   | 23    | 0.26                                      | 16 | 49                    | 37              | 12        | 3                      | 0   | 12    | 0.25                                      |
| 17                    | 80                    | 60              | 10        | 7                      | 8   | 20    | 0.35                                      | 17 | 57                    | 50              | 7         | 1                      | 0   | 7     | 0.14                                      |
| 18                    | 79                    | 57              | 8         | 3                      | 12  | 22    | 0.14                                      | 18 | 85                    | 60              | 16        | 4                      | 8   | 25    | 0.16                                      |
| 19                    | 93                    | 71              | 19        | 14                     | 3   | 22    | 0.64                                      | 19 | 63                    | 54              | 8         | 8                      | 0   | 9     | 0.89                                      |
| 20                    | 66                    | 45              | 18        | 4                      | 3   | 21    | 0.19                                      | 20 | 71                    | 60              | 11        | 7                      | 0   | 11    | 0.64                                      |
| 21                    | 101                   | 74              | 14        | 2                      | 11  | 27    | 0.07                                      | 21 | 53                    | 34              | 18        | 10                     | 0   | 19    | 0.53                                      |
| 22                    | 72                    | 55              | 12        | 3                      | 5   | 17    | 0.18                                      | 22 | 51                    | 48              | 3         | 1                      | 0   | 3     | 0.33                                      |
| 23                    | 83                    | 57              | 15        | 7                      | 9   | 26    | 0.27                                      | 23 | 49                    | 39              | 9         | 6                      | 1   | 10    | 0.60                                      |
| 24                    | 71                    | 40              | 21        | 14                     | 5   | 31    | 0.45                                      | 24 | 35                    | 27              | 7         | 7                      | 1   | 8     | 0.88                                      |
| 25                    | 92                    | 73              | 8         | 5                      | 7   | 19    | 0.26                                      | 25 | 45                    | 28              | 17        | 9                      | 0   | 17    | 0.53                                      |
| 26                    | 78                    | 58              | 11        | 8                      | 3   | 20    | 0.40                                      | 26 | 71                    | 59              | 8         | 4                      | 1   | 12    | 0.33                                      |
| 27                    | 80                    | 60              | 13        | 0                      | 7   | 20    | 0.00                                      | 27 | 55                    | 49              | 5         | 2                      | 1   | 6     | 0.33                                      |
| 28                    | 77                    | 56              | 10        | 2                      | 11  | 21    | 0.10                                      | 28 | 59                    | 29              | 30        | 27                     | 0   | 30    | 0.90                                      |
| 29                    | 60                    | 40              | 20        | 11                     | 0   | 20    | 0.55                                      | 29 | 43                    | 24              | 19        | 17                     | 0   | 19    | 0.89                                      |
| 30                    | 78                    | 69              | 6         | 0                      | 3   | 9     | 0.00                                      | 30 | 52                    | 44              | 5         | 2                      | 2   | 8     | 0.25                                      |
| 31                    | 95                    | 75              | 8         | 6                      | 9   | 20    | 0.30                                      | 31 | 55                    | 34              | 20        | 8                      | 0   | 21    | 0.38                                      |
| 32                    | 106                   | 88              | 13        | 6                      | 4   | 18    | 0.33                                      | 32 | 66                    | 56              | 10        | 2                      | 0   | 10    | 0.20                                      |
| 33                    | 80                    | 62              | 8         | 2                      | 8   | 18    | 0.11                                      | 33 | 65                    | 50              | 11        | 9                      | 4   | 15    | 0.60                                      |
| 34                    | 111                   | 82              | 12        | 0                      | 17  | 29    | 0.00                                      | 34 | 62                    | 49              | 11        | 6                      | 2   | 13    | 0.46                                      |
| 35                    | 110                   | 88              | 10        | 1                      | 12  | 22    | 0.05                                      | 35 | 48                    | 36              | 12        | 9                      | 0   | 12    | 0.75                                      |
| 36                    | 76                    | 59              | 10        | 6                      | 7   | 17    | 0.35                                      | 36 | 85                    | 69              | 6         | 0                      | 10  | 16    | 0.00                                      |
| 37                    | 96                    | 76              | 10        | 3                      | 10  | 20    | 0.15                                      | 37 | 73                    | 56              | 14        | 9                      | 1   | 17    | 0.53                                      |
| 38                    |                       |                 |           |                        |     |       |                                           | 38 | 76                    | 54              | 11        | 2                      | 11  | 22    | 0.09                                      |
| 39                    |                       |                 |           |                        |     |       |                                           | 39 |                       |                 |           |                        |     |       |                                           |

|                |      |      |      |     |     |      |      |
|----------------|------|------|------|-----|-----|------|------|
| 40             |      |      |      |     |     |      |      |
| <b>TOTAL</b>   | 3184 | 2438 | 423  | 175 | 281 | 746  | 8.89 |
| <b>AVERAGE</b> | 86.1 | 65.9 | 11.4 | 4.7 | 7.6 | 20.2 | 0.24 |
| <b>SEM</b>     | 2.3  | 2.2  | 0.6  | 0.6 | 0.7 | 0.8  | 0.03 |

|                |      |      |      |     |     |      |       |
|----------------|------|------|------|-----|-----|------|-------|
| 40             |      |      |      |     |     |      |       |
| <b>TOTAL</b>   | 2300 | 1809 | 403  | 222 | 74  | 491  | 17.68 |
| <b>AVERAGE</b> | 60.5 | 47.6 | 10.6 | 5.8 | 1.9 | 12.9 | 0.47  |
| <b>SEM</b>     | 2.1  | 2.0  | 0.9  | 0.8 | 0.4 | 0.9  | 0.05  |

Supplementary table S3 (contd.)

| KSOM + 1mM NAC |                       |                 |             |                        |            |             |             |                                           |
|----------------|-----------------------|-----------------|-------------|------------------------|------------|-------------|-------------|-------------------------------------------|
| DMSO           |                       |                 |             |                        |            |             |             | Ratio of NANOG-GATA6 double +ve/Total ICM |
| #              | TOTAL NUMBER OF CELLS |                 |             |                        |            |             |             |                                           |
|                | Embryo                | Double Negative | NANOG +ve   | NANOG-GATA6 double +ve | PrE        | Total       |             |                                           |
| 1              | 97                    | 75              | 13          | 4                      | 8          | 22          | 0.18        |                                           |
| 2              | 73                    | 51              | 17          | 17                     | 2          | 22          | 0.77        |                                           |
| 3              | 70                    | 43              | 14          | 5                      | 10         | 27          | 0.19        |                                           |
| 4              | 91                    | 68              | 13          | 4                      | 10         | 23          | 0.17        |                                           |
| 5              | 62                    | 50              | 7           | 5                      | 2          | 12          | 0.42        |                                           |
| 6              | 75                    | 47              | 18          | 7                      | 9          | 28          | 0.25        |                                           |
| 7              | 91                    | 73              | 10          | 10                     | 7          | 18          | 0.56        |                                           |
| 8              | 64                    | 52              | 6           | 6                      | 6          | 12          | 0.50        |                                           |
| 9              | 84                    | 71              | 8           | 3                      | 4          | 13          | 0.23        |                                           |
| 10             | 77                    | 58              | 11          | 3                      | 8          | 19          | 0.16        |                                           |
| 11             | 84                    | 70              | 9           | 2                      | 5          | 14          | 0.14        |                                           |
| 12             |                       |                 |             |                        |            |             |             |                                           |
| <b>TOTAL</b>   | <b>868</b>            | <b>658</b>      | <b>126</b>  | <b>66</b>              | <b>71</b>  | <b>210</b>  | <b>3.57</b> |                                           |
| <b>AVERAGE</b> | <b>78.9</b>           | <b>59.8</b>     | <b>11.5</b> | <b>6.0</b>             | <b>6.5</b> | <b>19.1</b> | <b>0.32</b> |                                           |
| <b>SEM</b>     | <b>3.5</b>            | <b>3.5</b>      | <b>1.2</b>  | <b>1.3</b>             | <b>0.9</b> | <b>1.8</b>  | <b>0.06</b> |                                           |

| p38 Inhibited  |                       |                 |            |                        |            |            |             | Ratio of NANOG-GATA6 double +ve/Total ICM |
|----------------|-----------------------|-----------------|------------|------------------------|------------|------------|-------------|-------------------------------------------|
| #              | TOTAL NUMBER OF CELLS |                 |            |                        |            |            |             |                                           |
|                | Embryo                | Double Negative | NANOG +ve  | NANOG-GATA6 double +ve | PrE        | Total      |             |                                           |
| 1              | 78                    | 67              | 11         | 8                      | 0          | 11         | 0.73        |                                           |
| 2              | 83                    | 81              | 2          | 0                      | 0          | 2          | 0.00        |                                           |
| 3              | 81                    | 70              | 7          | 2                      | 4          | 11         | 0.18        |                                           |
| 4              | 47                    | 46              | 1          | 0                      | 0          | 1          | 0.00        |                                           |
| 5              | 45                    | 38              | 7          | 7                      | 0          | 7          | 1.00        |                                           |
| 6              | 75                    | 67              | 4          | 0                      | 4          | 8          | 0.00        |                                           |
| 7              | 65                    | 61              | 2          | 0                      | 2          | 4          | 0.00        |                                           |
| 8              | 60                    | 51              | 9          | 6                      | 0          | 9          | 0.67        |                                           |
| 9              | 70                    | 63              | 4          | 2                      | 3          | 7          | 0.29        |                                           |
| 10             | 60                    | 51              | 9          | 7                      | 0          | 9          | 0.78        |                                           |
| 11             |                       |                 |            |                        |            |            |             |                                           |
| 12             |                       |                 |            |                        |            |            |             |                                           |
| <b>TOTAL</b>   | <b>664</b>            | <b>595</b>      | <b>56</b>  | <b>32</b>              | <b>13</b>  | <b>69</b>  | <b>3.64</b> |                                           |
| <b>AVERAGE</b> | <b>66.4</b>           | <b>59.5</b>     | <b>5.6</b> | <b>3.2</b>             | <b>1.3</b> | <b>6.9</b> | <b>0.36</b> |                                           |
| <b>SEM</b>     | <b>4.3</b>            | <b>4.1</b>      | <b>1.1</b> | <b>1.1</b>             | <b>0.6</b> | <b>1.1</b> | <b>0.12</b> |                                           |

| KSOM + 10mM NAC |                       |                 |            |                        |            |             |             |                                           |
|-----------------|-----------------------|-----------------|------------|------------------------|------------|-------------|-------------|-------------------------------------------|
| DMSO            |                       |                 |            |                        |            |             |             | Ratio of NANOG-GATA6 double +ve/Total ICM |
| #               | TOTAL NUMBER OF CELLS |                 |            |                        |            |             |             |                                           |
|                 | Embryo                | Double Negative | NANOG +ve  | NANOG-GATA6 double +ve | PrE        | Total       |             |                                           |
| 1               | 103                   | 83              | 10         | 2                      | 8          | 20          | 0.10        |                                           |
| 2               | 81                    | 60              | 10         | 3                      | 11         | 21          | 0.14        |                                           |
| 3               | 82                    | 61              | 9          | 4                      | 11         | 21          | 0.19        |                                           |
| 4               | 95                    | 78              | 7          | 2                      | 10         | 17          | 0.12        |                                           |
| 5               | 83                    | 72              | 8          | 0                      | 3          | 11          | 0.00        |                                           |
| 6               | 93                    | 75              | 9          | 3                      | 9          | 18          | 0.17        |                                           |
| 7               | 83                    | 66              | 9          | 1                      | 8          | 17          | 0.06        |                                           |
| 8               | 102                   | 86              | 7          | 0                      | 9          | 16          | 0.00        |                                           |
| 9               | 72                    | 48              | 12         | 1                      | 12         | 24          | 0.04        |                                           |
| 10              |                       |                 |            |                        |            |             |             |                                           |
| <b>TOTAL</b>    | <b>794</b>            | <b>629</b>      | <b>81</b>  | <b>16</b>              | <b>81</b>  | <b>165</b>  | <b>0.82</b> |                                           |
| <b>AVERAGE</b>  | <b>88.2</b>           | <b>69.9</b>     | <b>9.0</b> | <b>1.8</b>             | <b>9.0</b> | <b>18.3</b> | <b>0.09</b> |                                           |
| <b>SEM</b>      | <b>3.5</b>            | <b>4.1</b>      | <b>0.5</b> | <b>0.5</b>             | <b>0.9</b> | <b>1.2</b>  | <b>0.02</b> |                                           |

| p38 Inhibited  |                       |                 |            |                        |            |             |             | Ratio of NANOG-GATA6 double +ve/Total ICM |
|----------------|-----------------------|-----------------|------------|------------------------|------------|-------------|-------------|-------------------------------------------|
| #              | TOTAL NUMBER OF CELLS |                 |            |                        |            |             |             |                                           |
|                | Embryo                | Double Negative | NANOG +ve  | NANOG-GATA6 double +ve | PrE        | Total       |             |                                           |
| 1              | 68                    | 55              | 9          | 3                      | 4          | 13          | 0.23        |                                           |
| 2              | 90                    | 74              | 8          | 1                      | 8          | 16          | 0.06        |                                           |
| 3              | 69                    | 61              | 8          | 6                      | 0          | 8           | 0.75        |                                           |
| 4              | 78                    | 59              | 13         | 7                      | 6          | 19          | 0.37        |                                           |
| 5              | 62                    | 52              | 10         | 7                      | 0          | 10          | 0.70        |                                           |
| 6              | 47                    | 39              | 6          | 4                      | 2          | 8           | 0.50        |                                           |
| 7              | 81                    | 67              | 8          | 2                      | 6          | 14          | 0.14        |                                           |
| 8              | 72                    | 64              | 7          | 7                      | 1          | 8           | 0.88        |                                           |
| 9              | 52                    | 45              | 5          | 3                      | 2          | 7           | 0.43        |                                           |
| 10             | 36                    | 25              | 8          | 3                      | 3          | 11          | 0.27        |                                           |
| <b>TOTAL</b>   | <b>655</b>            | <b>541</b>      | <b>82</b>  | <b>43</b>              | <b>32</b>  | <b>114</b>  | <b>4.33</b> |                                           |
| <b>AVERAGE</b> | <b>65.5</b>           | <b>54.1</b>     | <b>8.2</b> | <b>4.3</b>             | <b>3.2</b> | <b>11.4</b> | <b>0.43</b> |                                           |
| <b>SEM</b>     | <b>5.2</b>            | <b>4.6</b>      | <b>0.7</b> | <b>0.7</b>             | <b>0.9</b> | <b>1.3</b>  | <b>0.09</b> |                                           |

Supplementary table S3 (contd. 2)

| KSOM+AA + 1mM NAC |                       |                 |             |                        |            |             |             |                                           |
|-------------------|-----------------------|-----------------|-------------|------------------------|------------|-------------|-------------|-------------------------------------------|
| DMSO              |                       |                 |             |                        |            |             |             | Ratio of NANOG-GATA6 double +ve/Total ICM |
| #                 | TOTAL NUMBER OF CELLS |                 |             |                        |            |             | Total       |                                           |
|                   | Embryo                | Double Negative | NANOG +ve   | NANOG-GATA6 double +ve | PrE        | ICM         |             |                                           |
| 1                 | 97                    | 75              | 12          | 3                      | 9          | 22          | 0.14        |                                           |
| 2                 | 87                    | 77              | 7           | 9                      | 1          | 10          | 0.90        |                                           |
| 3                 | 49                    | 33              | 10          | 13                     | 3          | 16          | 0.81        |                                           |
| 4                 | 45                    | 30              | 11          | 13                     | 1          | 15          | 0.87        |                                           |
| 5                 | 68                    | 56              | 9           | 9                      | 2          | 12          | 0.75        |                                           |
| 6                 | 78                    | 50              | 17          | 6                      | 11         | 28          | 0.21        |                                           |
| 7                 | 78                    | 62              | 10          | 3                      | 5          | 16          | 0.19        |                                           |
| 8                 | 56                    | 53              | 3           | 1                      | 0          | 3           | 0.33        |                                           |
| 9                 | 68                    | 45              | 16          | 12                     | 5          | 23          | 0.52        |                                           |
| 10                | 91                    | 73              | 6           | 0                      | 12         | 18          | 0.00        |                                           |
| 11                | 78                    | 57              | 13          | 6                      | 8          | 21          | 0.29        |                                           |
| 12                | 89                    | 68              | 5           | 4                      | 12         | 21          | 0.19        |                                           |
| 13                | 93                    | 77              | 9           | 2                      | 7          | 16          | 0.93        |                                           |
| 14                | 88                    | 63              | 6           | 3                      | 18         | 25          | 0.12        |                                           |
| 15                | 73                    | 47              | 13          | 11                     | 9          | 26          | 0.42        |                                           |
| 16                | 67                    | 46              | 19          | 12                     | 2          | 21          | 0.57        |                                           |
| 17                | 79                    | 67              | 9           | 3                      | 3          | 12          | 0.25        |                                           |
| 18                | 100                   | 76              | 13          | 4                      | 11         | 24          | 0.17        |                                           |
| 19                | 93                    | 75              | 9           | 6                      | 8          | 18          | 0.33        |                                           |
| 20                | 90                    | 66              | 17          | 10                     | 7          | 24          | 0.42        |                                           |
| 21                |                       |                 |             |                        |            |             |             |                                           |
| 22                |                       |                 |             |                        |            |             |             |                                           |
| 23                |                       |                 |             |                        |            |             |             |                                           |
| 24                |                       |                 |             |                        |            |             |             |                                           |
| 25                |                       |                 |             |                        |            |             |             |                                           |
| <b>TOTAL</b>      | <b>1567</b>           | <b>1196</b>     | <b>214</b>  | <b>130</b>             | <b>134</b> | <b>371</b>  | <b>7.60</b> |                                           |
| <b>AVERAGE</b>    | <b>78.4</b>           | <b>59.8</b>     | <b>10.7</b> | <b>6.5</b>             | <b>6.7</b> | <b>18.6</b> | <b>0.38</b> |                                           |
| <b>SEM</b>        | <b>3.5</b>            | <b>3.2</b>      | <b>1.0</b>  | <b>1.0</b>             | <b>1.1</b> | <b>1.4</b>  | <b>0.06</b> |                                           |

| p38 Inhibited  |                       |                 |            |                        |            |             |             | Ratio of NANOG-GATA6 double +ve/Total ICM |
|----------------|-----------------------|-----------------|------------|------------------------|------------|-------------|-------------|-------------------------------------------|
| #              | TOTAL NUMBER OF CELLS |                 |            |                        |            |             | Total       |                                           |
|                | Embryo                | Double Negative | NANOG +ve  | NANOG-GATA6 double +ve | PrE        | ICM         |             |                                           |
| 1              | 79                    | 68              | 5          | 0                      | 6          | 11          | 0.00        |                                           |
| 2              | 57                    | 43              | 12         | 2                      | 2          | 14          | 0.14        |                                           |
| 3              | 63                    | 42              | 15         | 3                      | 5          | 21          | 0.14        |                                           |
| 4              | 66                    | 57              | 9          | 4                      | 0          | 9           | 0.44        |                                           |
| 5              | 60                    | 45              | 12         | 5                      | 3          | 15          | 0.33        |                                           |
| 6              | 81                    | 73              | 2          | 0                      | 6          | 8           | 0.00        |                                           |
| 7              | 95                    | 79              | 9          | 1                      | 6          | 16          | 0.06        |                                           |
| 8              | 59                    | 46              | 13         | 5                      | 0          | 13          | 0.38        |                                           |
| 9              | 13                    | 8               | 5          | 0                      | 0          | 5           | 0.00        |                                           |
| 10             | 76                    | 68              | 3          | 0                      | 5          | 8           | 0.00        |                                           |
| 11             | 28                    | 11              | 17         | 14                     | 0          | 17          | 0.82        |                                           |
| 12             | 96                    | 84              | 8          | 3                      | 4          | 12          | 0.25        |                                           |
| 13             | 76                    | 61              | 9          | 2                      | 4          | 15          | 0.13        |                                           |
| 14             | 71                    | 55              | 16         | 8                      | 0          | 16          | 0.50        |                                           |
| 15             | 45                    | 37              | 8          | 6                      | 0          | 8           | 0.75        |                                           |
| 16             | 58                    | 44              | 14         | 12                     | 0          | 14          | 0.86        |                                           |
| 17             | 85                    | 72              | 13         | 9                      | 0          | 13          | 0.69        |                                           |
| 18             | 60                    | 47              | 11         | 9                      | 2          | 13          | 0.69        |                                           |
| 19             | 80                    | 71              | 6          | 3                      | 3          | 9           | 0.33        |                                           |
| 20             | 63                    | 55              | 7          | 5                      | 1          | 8           | 0.63        |                                           |
| 21             | 62                    | 49              | 5          | 1                      | 8          | 13          | 0.08        |                                           |
| 22             | 22                    | 19              | 3          | 2                      | 0          | 3           | 0.67        |                                           |
| 23             |                       |                 |            |                        |            |             |             |                                           |
| 24             |                       |                 |            |                        |            |             |             |                                           |
| 25             |                       |                 |            |                        |            |             |             |                                           |
| <b>TOTAL</b>   | <b>1395</b>           | <b>1134</b>     | <b>202</b> | <b>94</b>              | <b>55</b>  | <b>261</b>  | <b>7.91</b> |                                           |
| <b>AVERAGE</b> | <b>63.4</b>           | <b>51.5</b>     | <b>9.2</b> | <b>4.3</b>             | <b>2.5</b> | <b>11.9</b> | <b>0.36</b> |                                           |
| <b>SEM</b>     | <b>4.6</b>            | <b>4.4</b>      | <b>0.9</b> | <b>0.8</b>             | <b>0.6</b> | <b>0.9</b>  | <b>0.06</b> |                                           |

| KSOM+AA + 10mM NAC |                       |                 |             |                        |            |             |             |                                           |
|--------------------|-----------------------|-----------------|-------------|------------------------|------------|-------------|-------------|-------------------------------------------|
| DMSO               |                       |                 |             |                        |            |             |             | Ratio of NANOG-GATA6 double +ve/Total ICM |
| #                  | TOTAL NUMBER OF CELLS |                 |             |                        |            |             | Total       |                                           |
|                    | Embryo                | Double Negative | NANOG +ve   | NANOG-GATA6 double +ve | PrE        | ICM         |             |                                           |
| 1                  | 84                    | 61              | 17          | 4                      | 6          | 23          | 0.17        |                                           |
| 2                  | 64                    | 54              | 9           | 4                      | 1          | 10          | 0.40        |                                           |
| 3                  | 66                    | 41              | 21          | 9                      | 3          | 25          | 0.36        |                                           |
| 4                  | 66                    | 40              | 21          | 8                      | 1          | 26          | 0.31        |                                           |
| 5                  | 95                    | 67              | 16          | 1                      | 12         | 28          | 0.04        |                                           |
| 6                  | 58                    | 38              | 16          | 11                     | 3          | 20          | 0.55        |                                           |
| 7                  | 92                    | 76              | 6           | 0                      | 10         | 16          | 0.00        |                                           |
| 8                  | 45                    | 35              | 5           | 1                      | 4          | 10          | 0.10        |                                           |
| 9                  | 70                    | 55              | 7           | 1                      | 7          | 15          | 0.07        |                                           |
| 10                 | 91                    | 75              | 9           | 0                      | 7          | 16          | 0.00        |                                           |
| 11                 | 93                    | 78              | 8           | 4                      | 6          | 15          | 0.27        |                                           |
| 12                 | 84                    | 64              | 8           | 2                      | 11         | 20          | 0.10        |                                           |
| 13                 | 85                    | 65              | 10          | 4                      | 8          | 20          | 0.20        |                                           |
| 14                 | 69                    | 59              | 10          | 10                     | 0          | 10          | 1.00        |                                           |
| 15                 | 71                    | 56              | 7           | 3                      | 6          | 15          | 0.20        |                                           |
| 16                 | 94                    | 72              | 11          | 1                      | 11         | 22          | 0.05        |                                           |
| 17                 |                       |                 |             |                        |            |             |             |                                           |
| 18                 |                       |                 |             |                        |            |             |             |                                           |
| 19                 |                       |                 |             |                        |            |             |             |                                           |
| 20                 |                       |                 |             |                        |            |             |             |                                           |
| <b>TOTAL</b>       | <b>1227</b>           | <b>936</b>      | <b>181</b>  | <b>63</b>              | <b>96</b>  | <b>291</b>  | <b>3.81</b> |                                           |
| <b>AVERAGE</b>     | <b>76.7</b>           | <b>58.5</b>     | <b>11.3</b> | <b>3.9</b>             | <b>6.0</b> | <b>18.2</b> | <b>0.24</b> |                                           |
| <b>SEM</b>         | <b>3.8</b>            | <b>3.5</b>      | <b>1.3</b>  | <b>0.9</b>             | <b>0.9</b> | <b>1.4</b>  | <b>0.06</b> |                                           |

| p38 Inhibited  |                       |                 |            |                        |            |             |             | Ratio of NANOG-GATA6 double +ve/Total ICM |
|----------------|-----------------------|-----------------|------------|------------------------|------------|-------------|-------------|-------------------------------------------|
| #              | TOTAL NUMBER OF CELLS |                 |            |                        |            |             | Total       |                                           |
|                | Embryo                | Double Negative | NANOG +ve  | NANOG-GATA6 double +ve | PrE        | ICM         |             |                                           |
| 1              | 25                    | 19              | 6          | 2                      | 0          | 6           | 0.33        |                                           |
| 2              | 53                    | 44              | 5          | 1                      | 3          | 9           | 0.11        |                                           |
| 3              | 63                    | 46              | 12         | 3                      | 3          | 17          | 0.18        |                                           |
| 4              | 97                    | 80              | 9          | 0                      | 8          | 17          | 0.00        |                                           |
| 5              | 60                    | 49              | 11         | 7                      | 0          | 11          | 0.64        |                                           |
| 6              | 81                    | 66              | 11         | 3                      | 4          | 15          | 0.20        |                                           |
| 7              | 74                    | 57              | 13         | 2                      | 4          | 17          | 0.12        |                                           |
| 8              | 67                    | 58              | 9          | 5                      | 0          | 9           | 0.56        |                                           |
| 9              | 81                    | 58              | 11         | 0                      | 12         | 23          | 0.00        |                                           |
| 10             | 74                    | 65              | 7          | 4                      | 1          | 9           | 0.44        |                                           |
| 11             | 106                   | 90              | 9          | 0                      | 7          | 16          | 0.00        |                                           |
| 12             |                       |                 |            |                        |            |             |             |                                           |
| 13             |                       |                 |            |                        |            |             |             |                                           |
| 14             |                       |                 |            |                        |            |             |             |                                           |
| 15             |                       |                 |            |                        |            |             |             |                                           |
| 16             |                       |                 |            |                        |            |             |             |                                           |
| 17             |                       |                 |            |                        |            |             |             |                                           |
| 18             |                       |                 |            |                        |            |             |             |                                           |
| 19             |                       |                 |            |                        |            |             |             |                                           |
| 20             |                       |                 |            |                        |            |             |             |                                           |
| <b>TOTAL</b>   | <b>781</b>            | <b>632</b>      | <b>103</b> | <b>27</b>              | <b>42</b>  | <b>149</b>  | <b>2.57</b> |                                           |
| <b>AVERAGE</b> | <b>71.0</b>           | <b>57.5</b>     | <b>9.4</b> | <b>2.5</b>             | <b>3.8</b> | <b>13.5</b> | <b>0.23</b> |                                           |
| <b>SEM</b>     | <b>6.6</b>            | <b>5.7</b>      | <b>0.8</b> | <b>0.7</b>             | <b>1.2</b> | <b>1.5</b>  | <b>0.07</b> |                                           |



**Supplementary table S4 (antibodies used):** Antibodies used for immunofluorescence staining and western blotting

| Sl. No.                           | Antibody                                                                               | Type                  | Target               | Host / isotype | Manufacturer                                 | Catalogue number | Dilution used          |
|-----------------------------------|----------------------------------------------------------------------------------------|-----------------------|----------------------|----------------|----------------------------------------------|------------------|------------------------|
| <b>Immunofluorescence imaging</b> |                                                                                        |                       |                      |                |                                              |                  |                        |
| 1                                 | Nanog (eBioMLC-51)                                                                     | Primary; monoclonal   | Mouse                | Rat / IgG2a    | Thermo Fisher Scientific Inc. (eBioscience™) | 14-5761-80       | 1:200 in PBST (3% BSA) |
| 2                                 | GATA-4 (H-112)                                                                         | Primary; polyclonal   | Mouse, rat and human | Rabbit / IgG   | Santa Cruz Biotechnology, Inc.               | sc-9053          | 1:200 in PBST (3% BSA) |
| 3                                 | GATA-6                                                                                 | Primary; polyclonal   | Human and mouse      | Goat / IgG     | R&D Systems™                                 | AF1700           | 1:200 in PBST (3% BSA) |
| 4                                 | Donkey anti-Rat IgG (H+L) Highly Cross-Adsorbed Secondary Antibody, Alexa Fluor 488    | Secondary; polyclonal | Rat                  | Donkey / IgG   | Thermo Fisher Scientific Inc.                | A-21208          | 1:500 in PBST (3% BSA) |
| 5                                 | Donkey anti-Rabbit IgG (H+L) Highly Cross-Adsorbed Secondary Antibody, Alexa Fluor 555 | Secondary; polyclonal | Rabbit               | Donkey / IgG   | Thermo Fisher Scientific Inc.                | A-31572          | 1:500 in PBST (3% BSA) |
| 6                                 | Donkey Anti-Goat IgG H&L (Alexa Fluor® 647)                                            | Secondary; polyclonal | Goat                 | Donkey / IgG   | Abcam plc.                                   | ab150131         | 1:500 in PBST (3% BSA) |
| 7                                 | Donkey Anti-Rabbit IgG H&L (Alexa Fluor® 647)                                          | Secondary; polyclonal | Rabbit               | Donkey / IgG   | Abcam plc.                                   | ab150075         | 1:500 in PBST (3% BSA) |
| 8                                 | Goat Anti-Rat IgG H&L (Cy3®) preadsorbed                                               | Secondary; polyclonal | Rat                  | Goat / IgG     | Abcam plc.                                   | ab98416          | 1:500 in PBST (3% BSA) |
| <b>Immunoblotting</b>             |                                                                                        |                       |                      |                |                                              |                  |                        |
| 9                                 | Phospho-p38 MAPK (Thr180/Tyr182) (28B10)                                               | Primary; monoclonal   | Mouse, rat and human | Mouse / IgG1   | Cell Signaling Technology, Inc.              | 9216S            | 1:500 in 1% milk       |
| 10                                | GAPDH                                                                                  | Primary; polyclonal   | Mouse, rat and human | Rabbit         | Merck KGaA (Sigma-Aldrich, Inc.)             | G9545            | 1:20,000 in 1% milk    |
| 11                                | Peroxidase AffiniPure Goat Anti-Mouse IgG (H+L)                                        | Secondary; polyclonal | Mouse                | Goat / IgG     | Jackson ImmunoResearch Europe Ltd.           | 115-035-003      | 1:10,000 in 1% milk    |
| 12                                | Peroxidase AffiniPure Donkey Anti-Rabbit IgG (H+L)                                     | Secondary; polyclonal | Rabbit               | Donkey / IgG   | Jackson ImmunoResearch Europe Ltd.           | 711-035-152      | 1:10,000 in 1% milk    |

**Supplementary table S5 (ANOVA results for figures 4 and 5e & e’):**  
 Welch's ANOVA test results (corresponding to figures 4, 5e and e')

**Welch's ANOVA test**

|                                 | KSOM           |                 | KSOM+AA     |                 |
|---------------------------------|----------------|-----------------|-------------|-----------------|
|                                 | DMSO           | SB220025 (p38i) | DMSO        | SB220025 (p38i) |
| <b>Total cell number</b>        | 0.5568 (ns)    | 0.0005 (***)    | 0.2422 (ns) | 0.1291 (ns)     |
| <b>Outer cell number</b>        | 0.6594 (ns)    | 0.0019 (**)     | 0.2643 (ns) | 0.2595 (ns)     |
| <b>Inner cell number</b>        | 0.6266 (ns)    | 0.0229 (*)      | 0.7817 (ns) | 0.1476 (ns)     |
| <b>Epiblast cell number</b>     | 0.0959 (ns)    | 0.1745 (ns)     | 0.9893 (ns) | 0.5693 (ns)     |
| <b>PrE cell number</b>          | 0.9329 (ns)    | 0.0022 (**)     | 0.5677 (ns) | 0.2169 (ns)     |
| <b>PrE to ICM ratio</b>         | 0.6893 (ns)    | 0.0015 (**)     | 0.6342 (ns) | 0.2126 (ns)     |
| <b>Uncommitted to ICM ratio</b> | <0.0001 (****) | 0.0002 (***)    | 0.1308 (ns) | 0.0348 (*)      |

**Supplementary table S6 (oligonucleotide primers used for Q-RT PCR; Fig 3h):**

Oligonucleotide primers used for Q-RT PCR (corresponding to figure 3h)

| <b>Sequences of oligonucleotide primer pairs used for Q-RT PCR</b> |             |                               |                               |
|--------------------------------------------------------------------|-------------|-------------------------------|-------------------------------|
| <b>Sl. No.</b>                                                     | <b>Gene</b> | <b>Forward primer (5'-3')</b> | <b>Reverse primer (5'-3')</b> |
| 1                                                                  | H2afz       | GCGCAGCCATCCTGGAGTA           | CCGATCAGCGATTTGTGGA           |
| 2                                                                  | Cat         | TCCTCGTTCAGGATGTGGTT          | TGCGTGTAACACTCTCTCAG          |
| 3                                                                  | Sod1        | CGGTGAACCAGTTGTGTTGT          | GGTCTCCAACATGCCTCTCT          |
| 4                                                                  | Sod2        | CAAGCACAGCCTCCCAGA            | ATCTGCGCGTTAATGTGTGG          |

Supplementary Fig. S1 (supplementary to Fig 3 b (fixed))

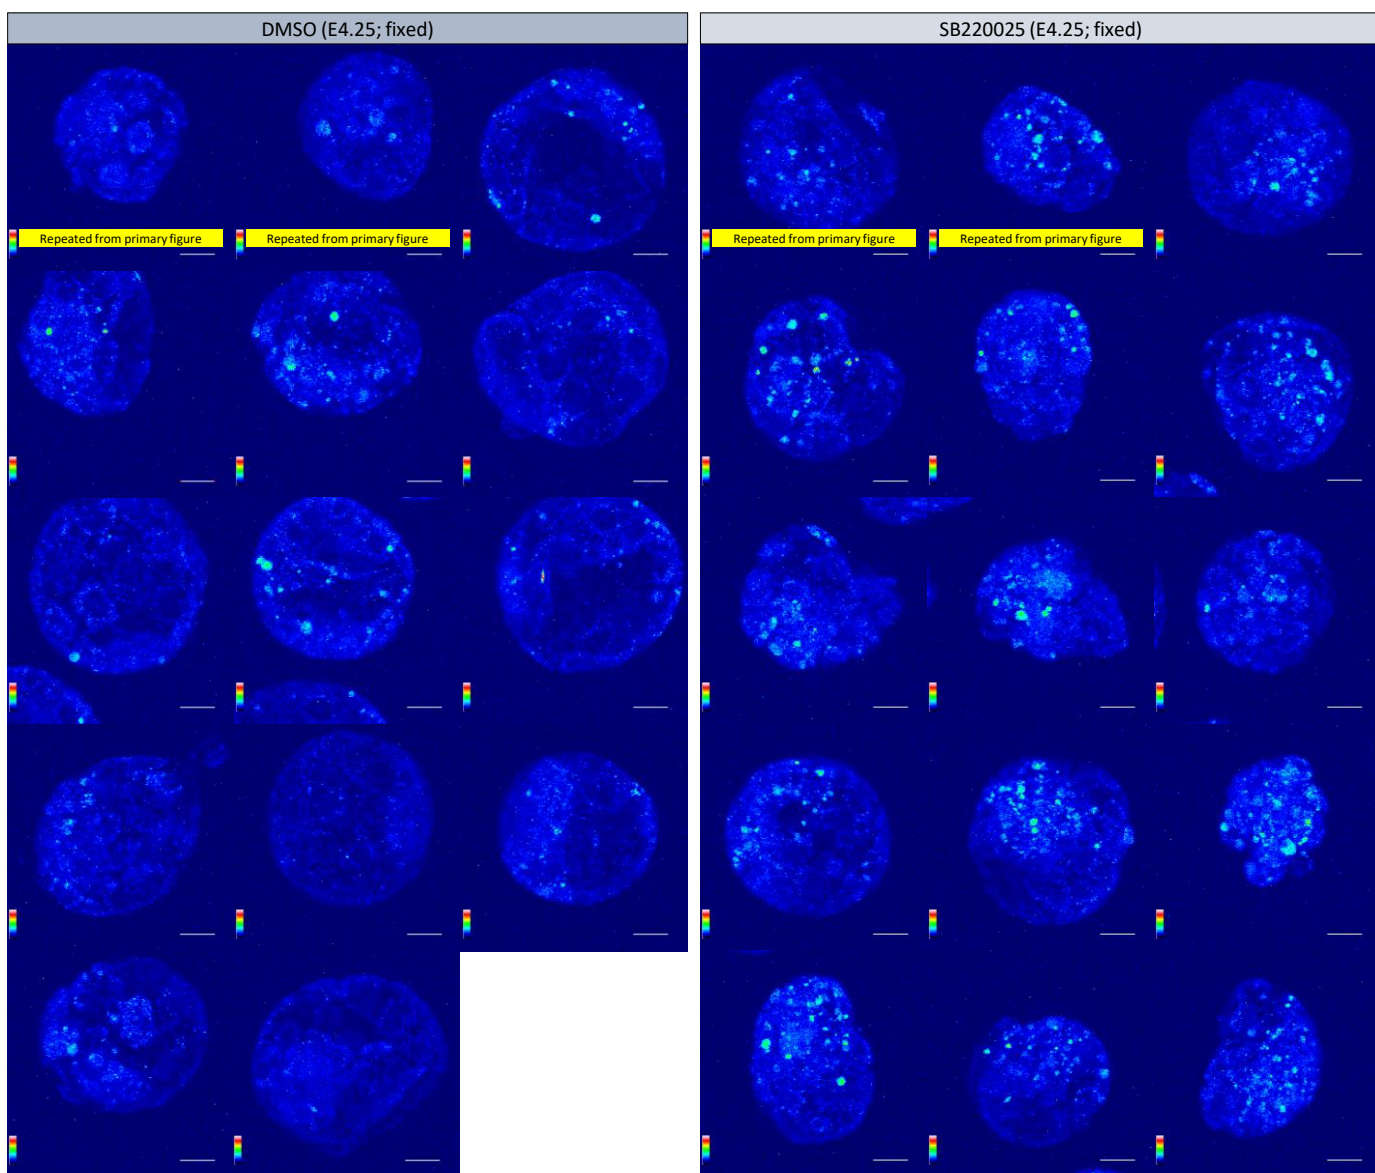

(Supplementary table to Fig 3 c)

Count of ROX-positive foci (maxima) for E4.25

|         | KSOM   |          |
|---------|--------|----------|
|         | DMSO   | SB220025 |
|         | 204    | 442      |
|         | 291    | 422      |
|         | 314    | 466      |
|         | 456    | 462      |
|         | 543    | 617      |
|         | 423    | 541      |
|         | 393    | 589      |
|         | 591    | 623      |
|         | 385    | 478      |
|         | 393    | 520      |
|         | 144    | 668      |
|         | 461    | 608      |
|         | 389    | 640      |
|         | 237    | 346      |
|         |        | 567      |
| Average | 373.14 | 532.60   |
